# Supplementary material for: A deep transcriptomic resource for the copepod crustacean Labidocera madurae: A potential indicator species for assessing near shore ecosystem health
Source: PubMed Central journal article supplement (PMC5655441; doi:10.1371/journal.pone.0186794), 2017-10-24
Supplement: pone.0186794.s001.pdf [file pone.0186794.s001.pdf]

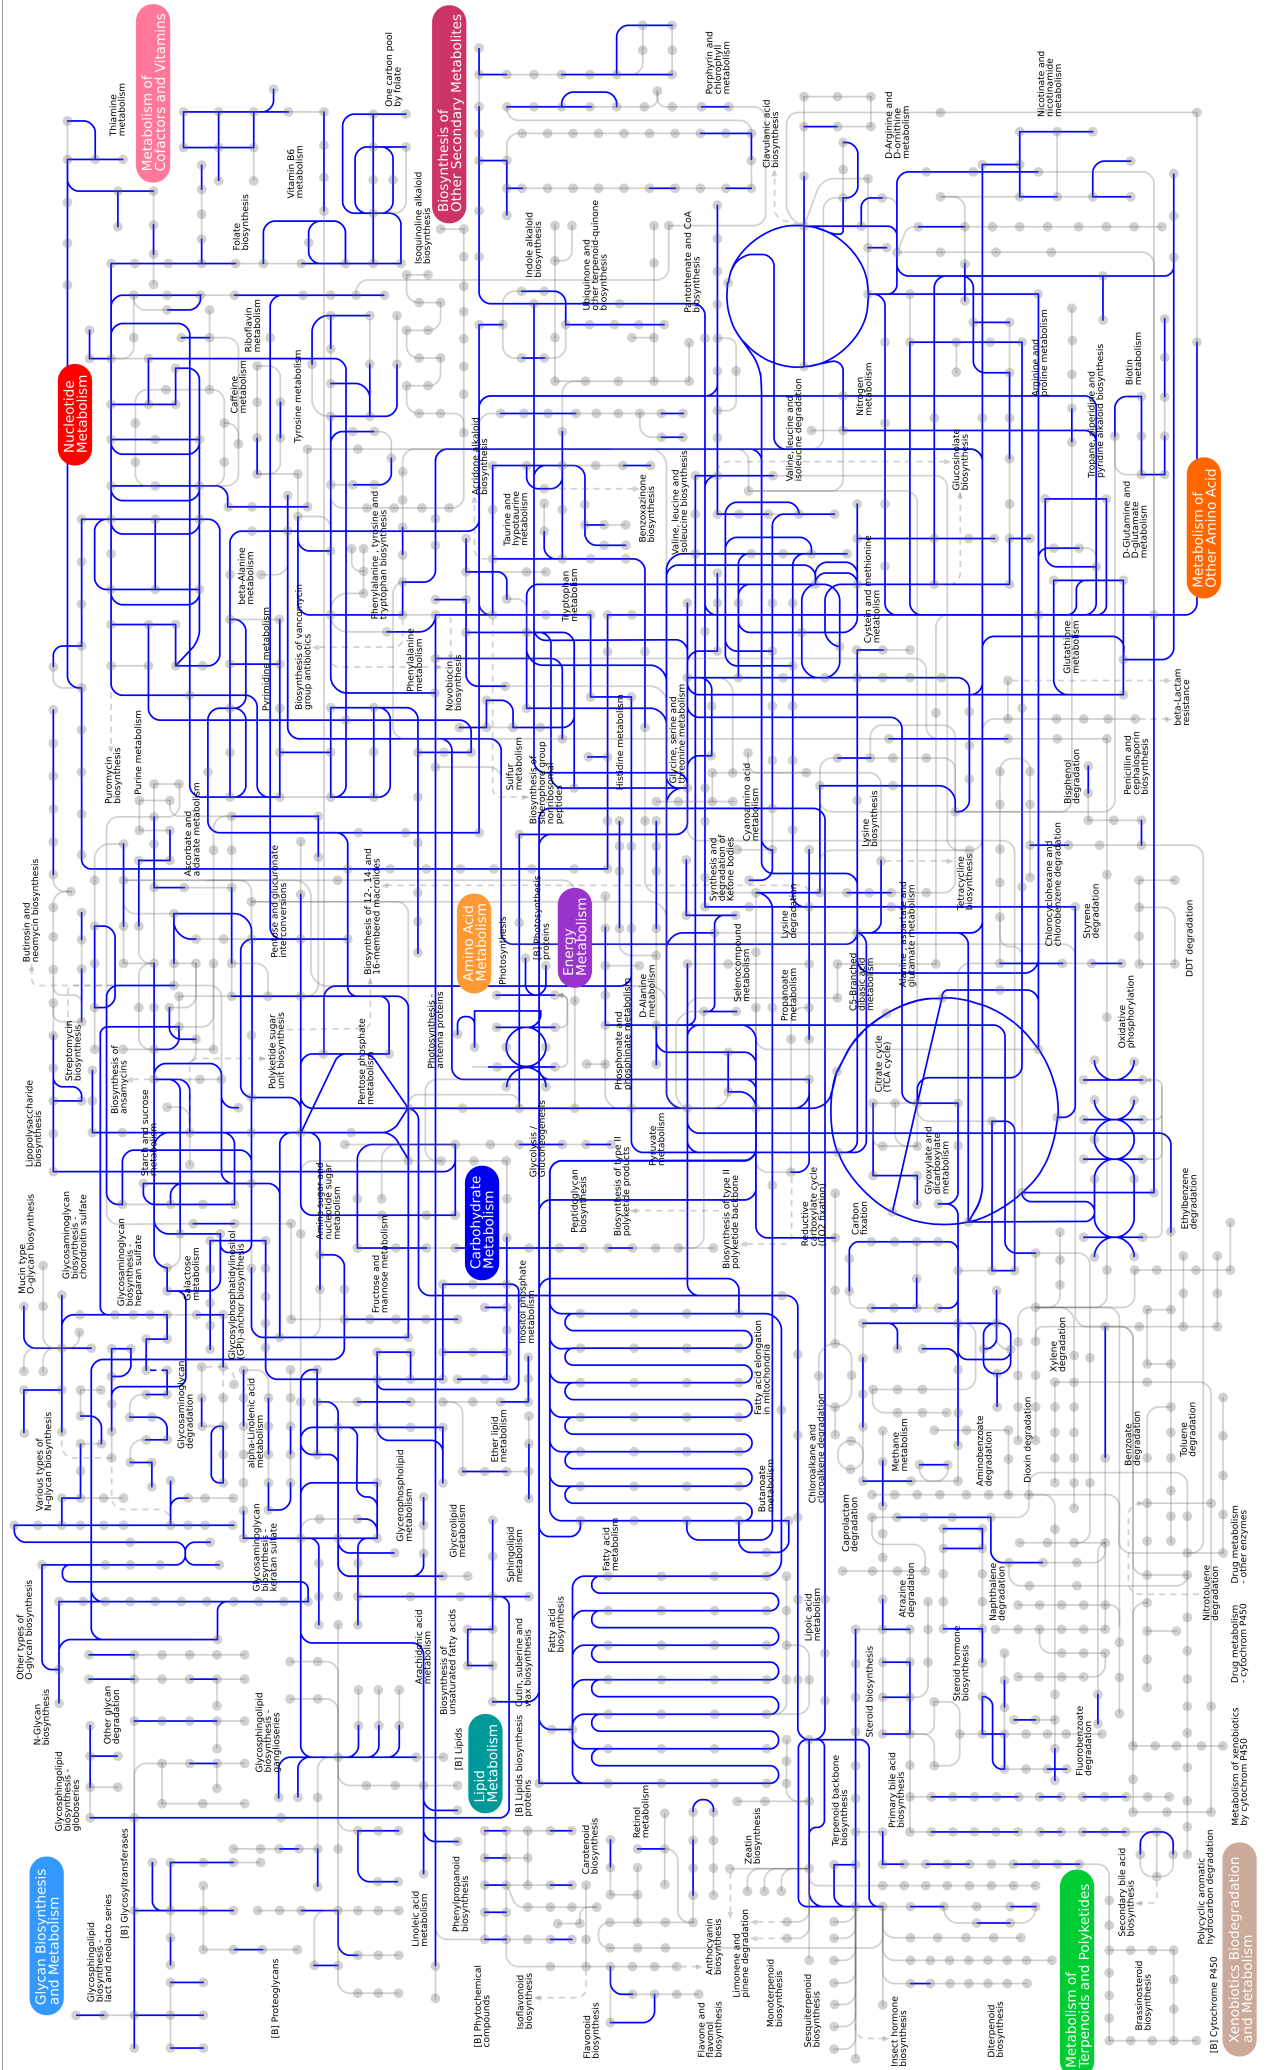

**Glycan Biosynthesis and Metabolism**

**Lipid Metabolism**

**Carbohydrate Metabolism**

**Energy Metabolism**

**Amino Acid Metabolism**

**Nucleotide Metabolism**

**Metabolism of Other Secondary Metabolites**

**Metabolism of Other Amino Acid**

**Metabolism of Terpenoids and Polyketides**

**Xenobiotics Biodegradation and Metabolism**
