# Supplementary material for: A deep transcriptomic resource for the copepod crustacean Labidocera madurae: A potential indicator species for assessing near shore ecosystem health
Source: PubMed Central journal article supplement (PMC5655441; doi:10.1371/journal.pone.0186794), 2017-10-24
Supplement: pone.0186794.s003.pdf [file pone.0186794.s003.pdf]

Figure S3

```
Labma-PP1-I M-----
Labma-PP1-II MDAK-----FGGP-----GG
Labma-PP1-III M-----G
Labma-PP1-IV MSIEVPTSDSSAINYSTPIQDVNVNVSRRPTIKNPVKPLTRMMRNLDANGSSVPNLTTNG
*
Labma-PP1-I ---AEGEINIDNIIQRLLVEVRS--RPGKTVQMSEAEVRGLCLKSRELFLOQPILLELEAP
Labma-PP1-II GGKETDKLNIDSIIARLLEVRGS--RPGKNVQLSEYEIRGLCLKSRELFISQPIILLELEAP
Labma-PP1-III EKGDVSEVDVDSIIDRLLEVRGC--RPGKQVQLDEHEIKWLCSKSREIFISQPIILLELEAP
Labma-PP1-IV TSNTQSNQLIDSII SKLIDIGMSGRVPRVLPKSSDILWLLAQVQPIILLSQPTLLEIQAP
.: :*.** :*:: . * : : .. : : * : : : :*.** **::**
Labma-PP1-I LKICGDIHQYTDLLRLFEYGGFPPEANYLFLGDYVDRGKQSLETICLLAYKIKYPENF
Labma-PP1-II LKICGDVHGQYDILLRLFEYGGFPPEANYLFLGDYVDRGKQSLETICLLAYKIKYPENF
Labma-PP1-III IKICGDIHQYDILLRLFEYGGFPPEANYLFLGDYVDRGKQSLETICLLAYKIKYPENF
Labma-PP1-IV VKIVGDIHQYLDLMLRIFTKSGWPPGSNYLFLGDYVDRGKQSLETILLFAPKVRVKGRF
:* **:* **:* **:* **:* **:* **:* **:* **:* **:* **:* **:* **:* **:*
Labma-PP1-I FLLRGNHECASNRIYGFYDECKRRYNIKLWKTFTDCFNCLPIAAI VDEKIFCCHGGLSP
Labma-PP1-II FLLRGNHECASNRIYGFYDECKRRYNVVKLWKTFTDCFNCLPVAAI VDEKIFCCHGGLSP
Labma-PP1-III FILRGNHECASNRIYGFYDECKRRYNIKLWKTFTDCFNCLPIAAI IDEKIFTMHGGLSP
Labma-PP1-IV FLLRGNHECQGICRVYGFYDECKRRASVKIWKSFVDTFNCLPIAAV VADKIFCVHGGGLSP
*:* **:* **:* **:* **:* **:* **:* **:* **:* **:* **:* **:* **:*
Labma-PP1-I DLQSMEQIRRMPTDVPDPTGLLCDLLWSDPKDKVQGWGENDRGVSFTFGADVVSFKFLNR
Labma-PP1-II DLQSMEQIRRMPTDVPDQGLLCDLLWSDPKDKTMGWGENDRGVSFTFGAEVVSFKFLHK
Labma-PP1-III DLQSMEQIRRVMPRTDVPDPTGLLCDLLWSDPEKEITGWGENDRGVSFTFGPDVVSRLFQN
Labma-PP1-IV ELNSMQRIRDIERPTEVPDFGLINDLLWSDPSHSAVDWEDSDRGVSYCFGRDILSRFLHK
:* **:* **:* **:* **:* **:* **:* **:* **:* **:* **:* **:* **:*
Labma-PP1-I HDLDLICRAHQVVEDGYEFFAKRQLVTLFSAPNYCGEFDNAGGMSVDETLMCSFQILKP
Labma-PP1-II HDFDLICRAHQVVEDGYEFFAKRQLVTLFSAPNYCGEFDNAGAMMSVDETLMCSFQILKP
Labma-PP1-III HEMDLICRAHQVVEDGYEFFAKRQLVTLFSAPNYCGEFDNAGAMMSVDDTLMCSFQILKP
Labma-PP1-IV HKFDLLARAHMVVEDGYEFFANRGLVTIFSAFNYCGIFKNMGAVMIVEPDLVCRFDLLQP
*:* **:* **:* **:* **:* **:* **:* **:* **:* **:* **:* **:* **:*
Labma-PP1-I SEKKAKYQYQGLN--RPQT--PRGPQNNPQGNK-----
Labma-PP1-II ADKK--KFPYGGLNSSRPLTPPRGATQQKGGKK-----
Labma-PP1-III AEKKQKYTYAA-----GRMG-----
Labma-PP1-IV ASQA--SVTLQDEVVKADMAAAHAHAQLQNKDNGTGTGDSNVNAQDRASPGGSVLSRSL
.: : . .
Labma-PP1-I -----RK
Labma-PP1-II -----
Labma-PP1-III -----
Labma-PP1-IV TRGGKVLKSPGLGHKSVNGDQGVIISGARWNPNESPPEGSLITRDKSKR
```
