# Supplementary material for: A deep transcriptomic resource for the copepod crustacean Labidocera madurae: A potential indicator species for assessing near shore ecosystem health
Source: PubMed Central journal article supplement (PMC5655441; doi:10.1371/journal.pone.0186794), 2017-10-24

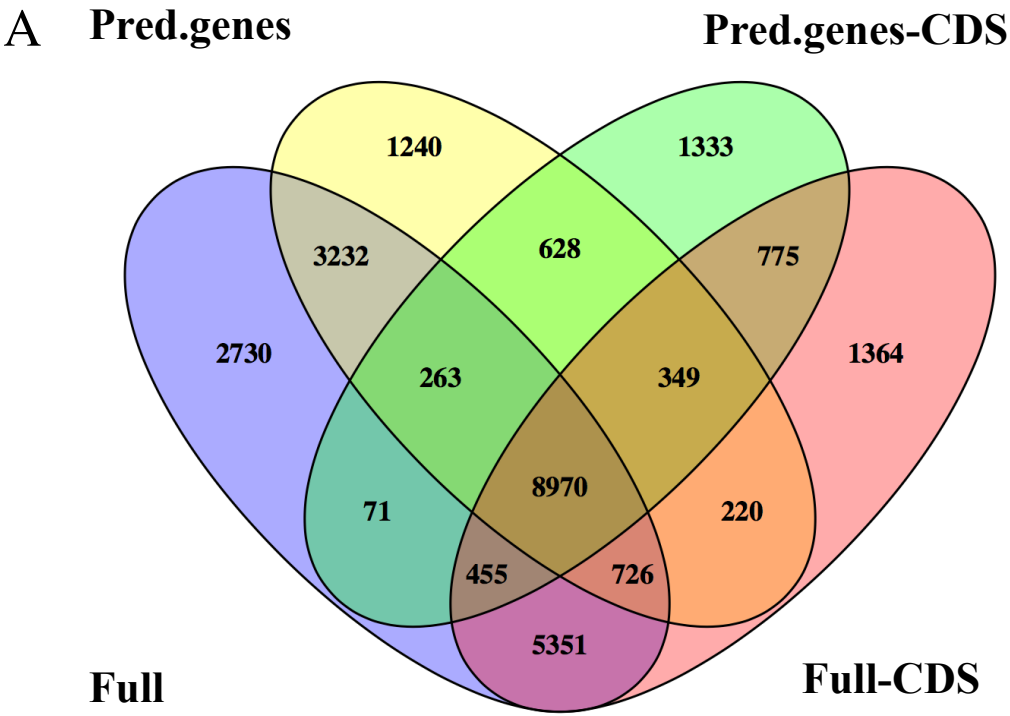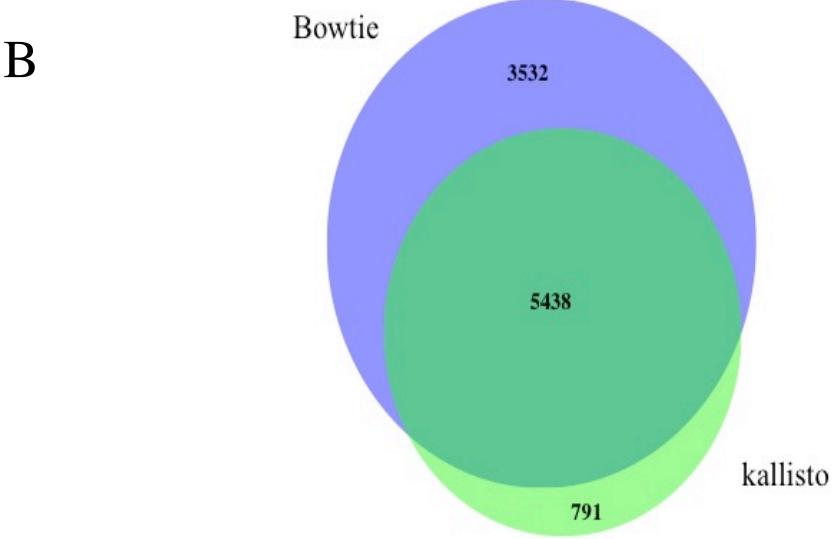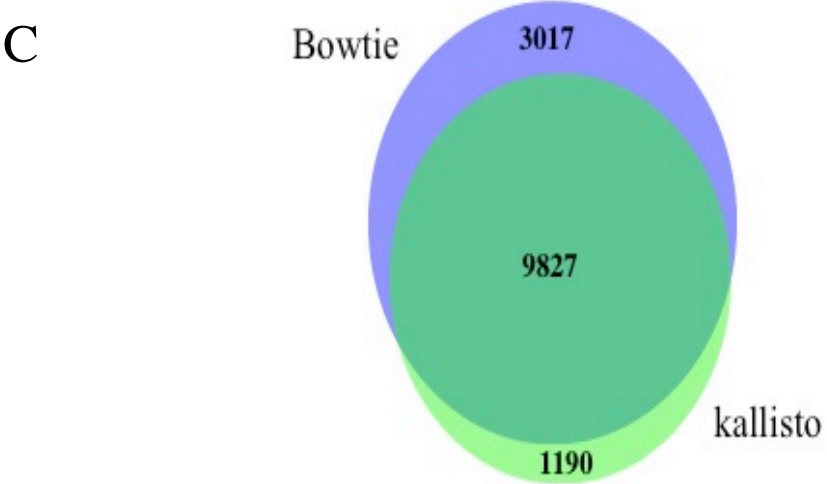

Supplement: pone.0186794.s004.pdf [file pone.0186794.s004.pdf]
