# Supplementary material for: A deep transcriptomic resource for the copepod crustacean Labidocera madurae: A potential indicator species for assessing near shore ecosystem health
Source: PLoS One. 2017 Oct 24;12(10):e0186794. doi: 10.1371/journal.pone.0186794 (PMC5655441; doi:10.1371/journal.pone.0186794)
Supplement: S2 Table — A) Crystallins have been searched in the list of automated annotated transcripts. For each transcript, Annotation name (NCBI) E-vale annotation (SwissProt) and Aceesion No. (NCBI) of top Blast hit. B) Putative GFP identifies via in silico transcriptome mining. For each L. madurae transcripts, transcript and protein name and Top hit results (Top hit Accession No.,and BLAST E-value) and protein length (aa) are listed. (XLSX) [file pone.0186794.s007.xlsx]

## Sheet: Crystallins
Transcript #	Annotation name (NCBI SwissProt)	E-value annotation	Accession No. Topblast hit
Crystallins
TR11601|c0_g1_i1	Alpha-crystallin B chain (Alpha(B)-crystallin)	4e-46	CRYAB_LITCT
TR30760|c0_g1_i1	Alpha-crystallin B chain (Alpha(B)-crystallin)	2e-61	CRYAB_SPAJD
TR30760|c0_g1_i2	Alpha-crystallin B chain (Alpha(B)-crystallin)	2e-79	CRYAB_SPAJD
TR30760|c0_g1_i3	Alpha-crystallin B chain (Alpha(B)-crystallin)	1e-66	CRYAB_SPAJD
TR30760|c0_g1_i4	Alpha-crystallin B chain (Alpha(B)-crystallin)	4e-70	CRYAB_SPAJD
TR30760|c0_g1_i5	Alpha-crystallin B chain (Alpha(B)-crystallin)	2e-87	CRYAB_SPAJD
TR32074|c0_g1_i1	Alpha-crystallin B chain (Alpha(B)-crystallin)	5e-96	CRYAB_SPAJD
TR46284|c0_g1_i1	Alpha-crystallin A chain (Fragment)	4e-88	CRYAA_RANTE
TR46284|c0_g1_i2	Alpha-crystallin A chain (Fragment)	4e-106	CRYAA_RANTE
TR49687|c0_g1_i1	Alpha-crystallin A chain (Fragment)	2e-63	CRYAA_RANTE
TR67659|c2_g1_i1	Alpha-crystallin A chain	1e-95	CRYAA_ARTJA
TR22375|c0_g1_i1	Crystallin J1A	2e-176	CRJ1A_TRICY
TR72911|c0_g1_i1	Crystallin J1B	0	CRJ1B_TRICY
TR72911|c0_g1_i2	Crystallin J1B	1e-158	CRJ1B_TRICY
TR83648|c0_g1_i1	Crystallin J1C	6e-91	CRJ1C_TRICY
TR11931|c5_g4_i1	Beta-crystallin A3-2	1e-84	CRB32_LITCT
TR46956|c4_g2_i1	Beta-crystallin A2 (Beta-A2 crystallin)	7e-55	CRBA2_CHICK
TR19408|c1_g1_i1	Lambda-crystallin homolog (EC 1.1.1.45) (L-gulonate 3-dehydrogenase) (Gul3DH)	1e-62	CRYL1_HUMAN
TR30610|c0_g1_i1	S-crystallin SL20-1 (Major lens polypeptide)	2e-73	SCR20_NOTSL
TR57052|c0_g2_i1	Gamma-crystallin A (Gamma-A-crystallin) (Gamma-crystallin 1-1)	2e-61	CRGA_RAT

## Sheet: GFP
Query sequence	Transcript #	Length (nt)	P. m E-value	Labma name	Length (aa)	Type	% aa ID with its TopBlast	NCBI Acc. No.
ACT99046	TR48005|c0_g1_i1	896	3e-92	GFP-like isoform 1	222	Full	91	ACT99046	Pontella mimocerami
ACT99047	TR89379|c2_g1_i1	632	2e-45	GFP-like isoform 2	222	Partial	93	ACT99047	Pontella mimocerami
ACT99047	TR19596|c0_g3_i4	695	1e-70	GFP-like	177	Full	89	GFP_AEQVI	Aequorea victoria
